# Supplementary material
Source: PubMed Central journal article supplement (PMC4091146)
Supplement: auto-10-572-s01.pdf [file auto-10-572-s01.pdf]

## **Supplemental Material to:**

**Eunmyong Lee, Yeon Koo, Aylwin Ng, Yongjie Wei,  
Kate Luby-Phelps, Amy Juraszek, Ramnik J Xavier,  
Ondine Cleaver, Beth Levine, and James F Amatruda**

**Autophagy is essential for cardiac morphogenesis  
during vertebrate development**

**Autophagy 2014; 10(4)**

**<http://dx.doi.org/10.4161/auto.27649>**

**[www.landesbioscience.com/journals/autophagy/article/27649](http://www.landesbioscience.com/journals/autophagy/article/27649)**

A

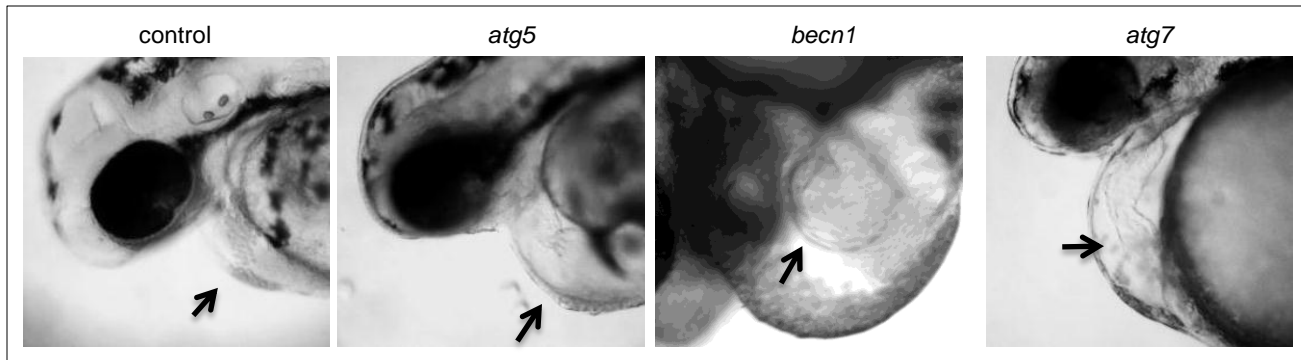

B

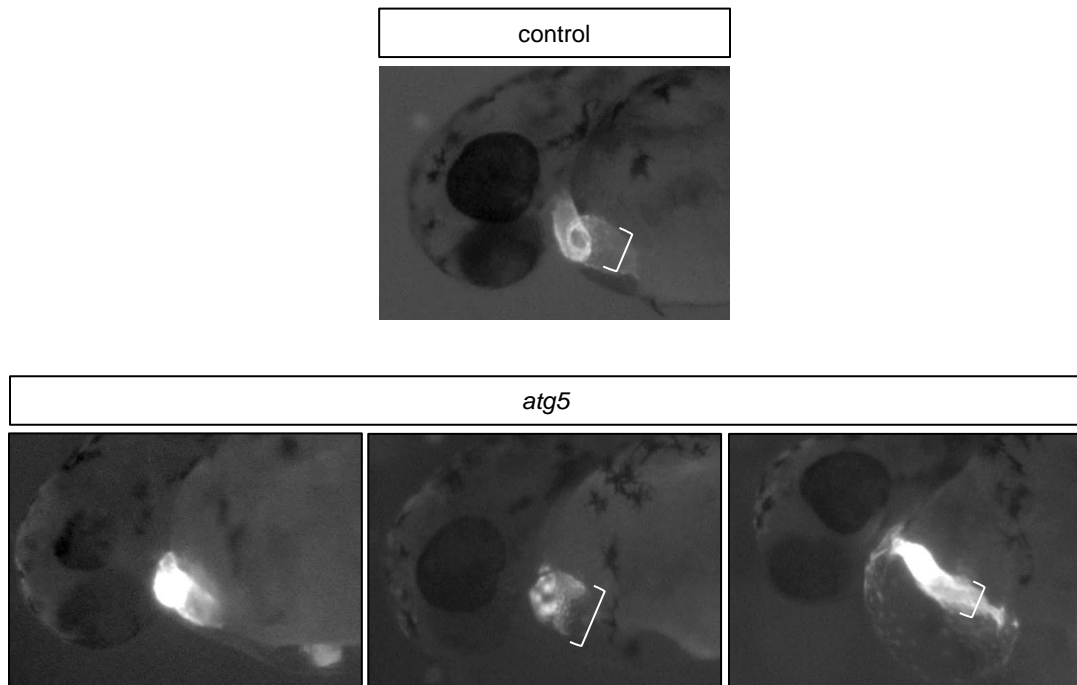

**Figure S1.** Autophagy gene knockdown results in cardiac defects. **(A)** Abnormal cardiac morphology in autophagy morphants including mislooping, abnormal cardiac chambers, and linearized hearts was observed at 2 dpf (arrows). **(B)** Representative images of the heart in control morphants or *atg5* morphants using *Tg(cmlc2::EGFP)* fish at 2 dpf. Compared to control, *atg5* morphant hearts show atrial enlargement (bottom; middle panel) or failure of looping with a resulting long, linear heart tube (bottom; right panel).

A

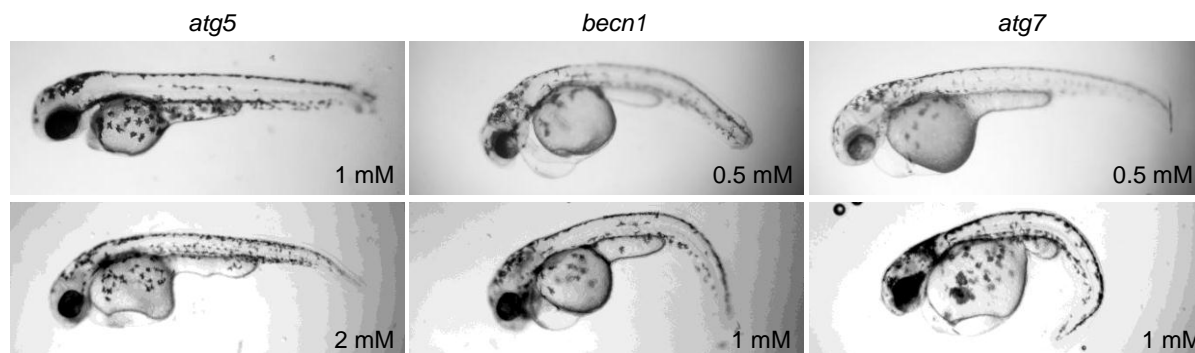

B

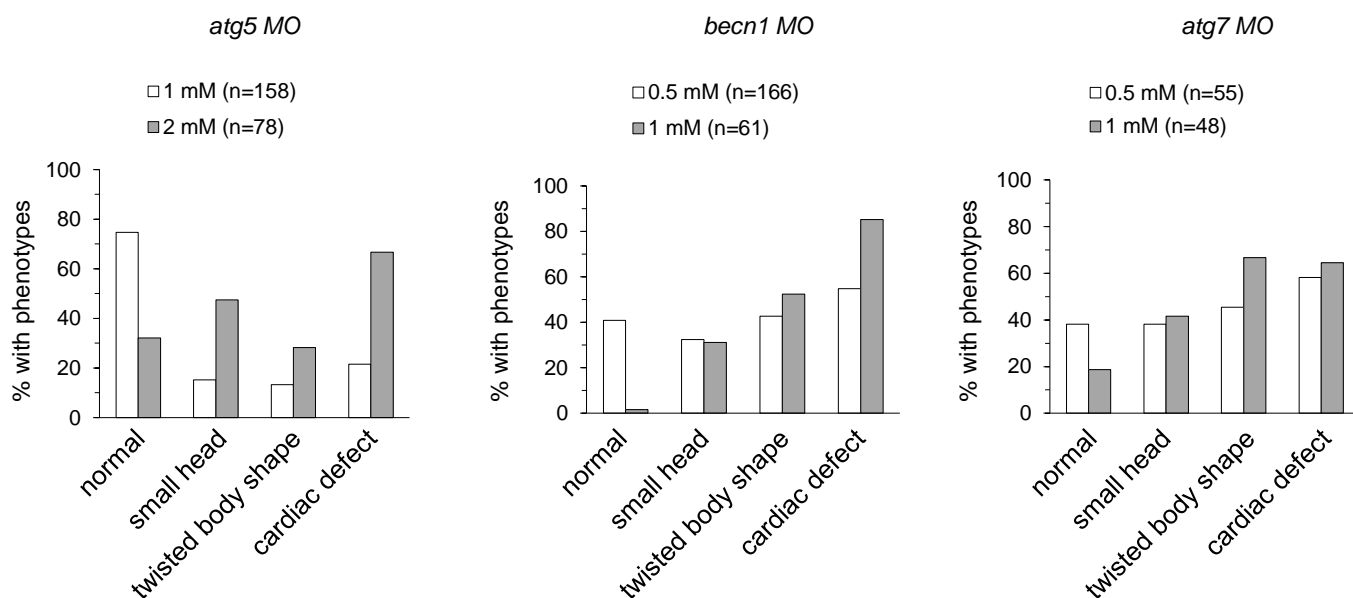

C

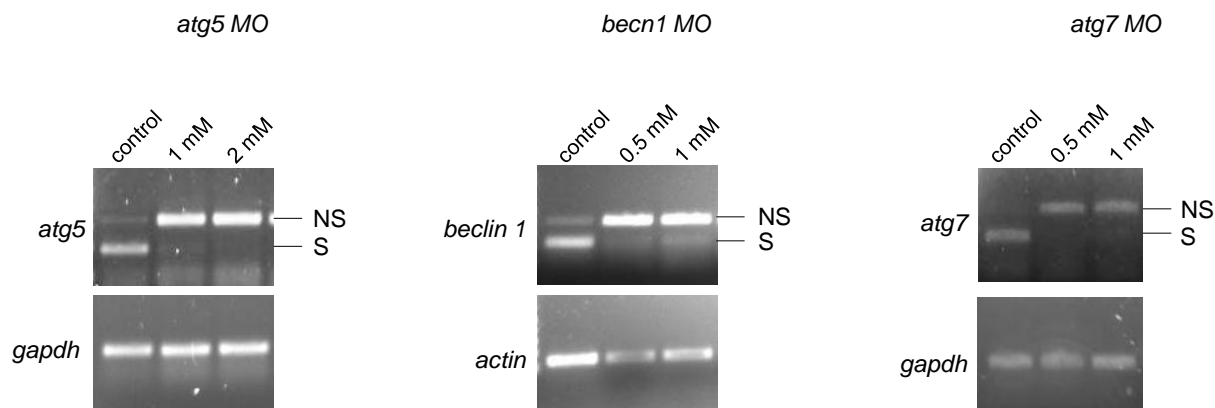

**Figure S2.** Autophagy is efficiently inhibited in a dose-dependent manner by splice-blocking morpholinos (MOs). **(A)** Morphology of autophagy morphants at 2 dpf. Embryos were injected with two different concentrations of each splicing MO. Phenotypes including cardiac defects were dose-dependent. **(B)** Quantification of data shown in **(A)**. **(C)** Impaired splicing by splicing MO injections was confirmed by RT-PCR. RNA was isolated from autophagy morphants at 2 dpf and PCR reactions were done using splicing site-specific primer sets. NS; non-spliced, S, spliced. In control morphants, a spliced form of RNA was mainly detected at 2 dpf by RT-PCR; however, in autophagy morphants, non-spliced RNAs were more predominant than the spliced RNA form.

A

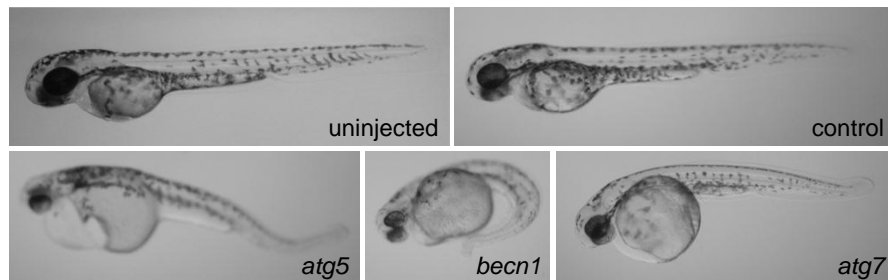

B

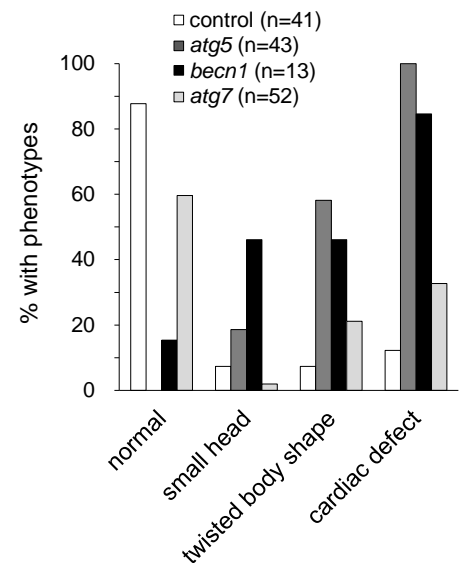

C

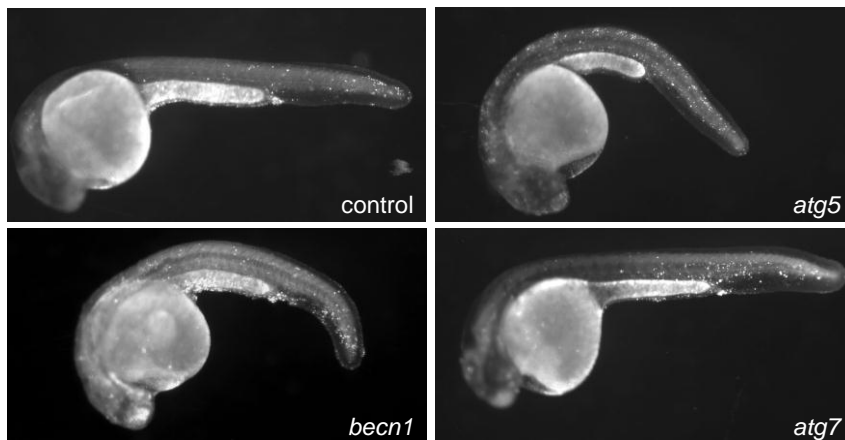

D

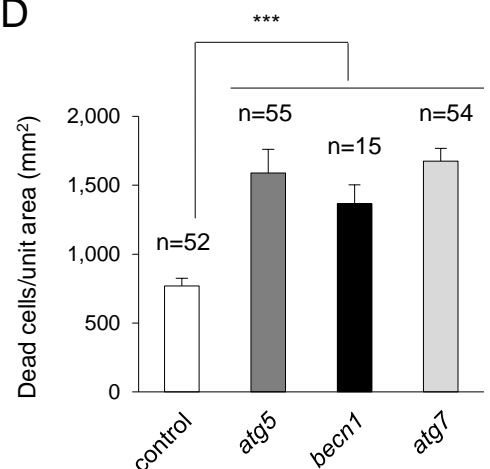

**Figure S3.** Autophagy gene knockdown results in developmental defects and increased numbers of dead cells in a Tp53 mutant background. **(A and B)** Morphology of autophagy morphants in a Tp53<sup>M214K</sup> mutant background at 2 dpf. Autophagy morphants showed small heads, twisted body shapes and cardiac defects at 2 dpf. **(B)** Quantification of data shown in **(A)**. More than 10 embryos in each group were analyzed. **(C and D)** Acridine orange (AO) staining of control and autophagy morphants in Tp53<sup>M214K</sup> mutant zebrafish at 1 dpf. AO-positive cells were counted in a region spanning from the end of the yolk tube extension to the end of the tail. **(D)** Quantification of data shown in **(C)** [*atg5* and *atg7* should be in italics]. Results represent the mean  $\pm$  SEM of more than 40 embryos in each group. \*\*\* $P < 0.001$ ; one-tailed t-test.

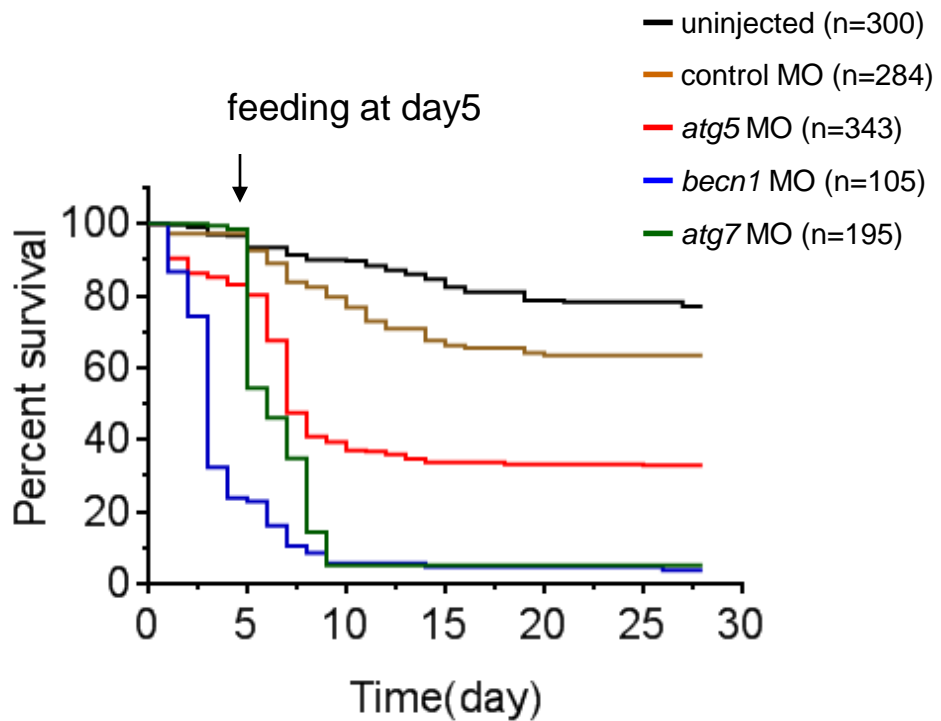

**Figure S4.** Effect of autophagy gene knockdown on long-term viability of zebrafish. Survival of control and autophagy gene morphants was monitored for 28 days after morpholino injection. Compared to control morphants, autophagy gene morphants exhibited impaired survival (\*\* $P < 0.001$  for autophagy morphants versus control morphants; Log-rank test).

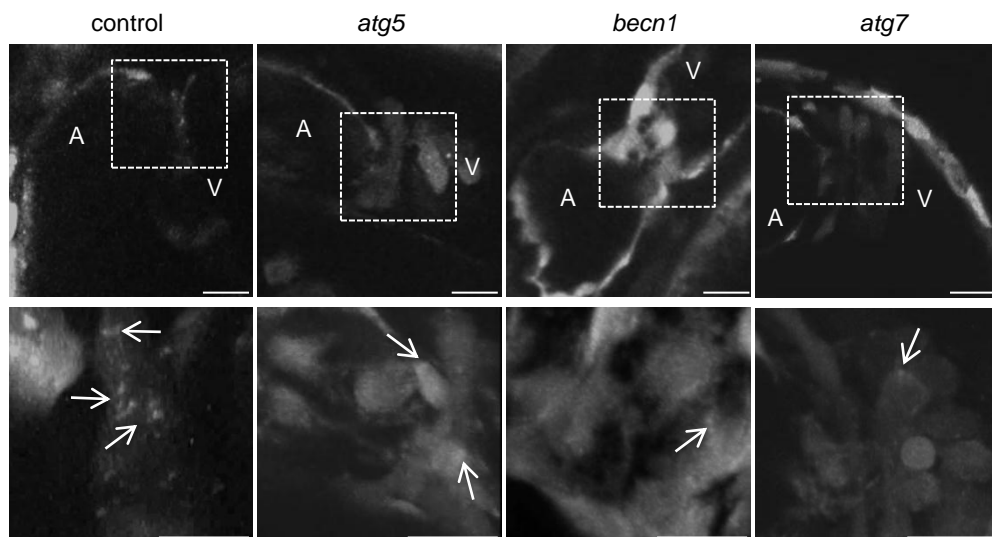

**Figure S5.** Autophagy is detectable in the 2 dpf heart of *GFP-LC3* transgenic embryos. Representative images showing GFP-Lc3 puncta (white arrows) at 2 dpf. *Tg(cmv:GFP-lc3)* embryos were injected with either control or autophagy MOs and imaged at 2 dpf using confocal microscopy. The areas delineated by the white dashed lines are shown as z-stack images at higher magnification in the bottom panel. Scale bar, 20  $\mu$ m

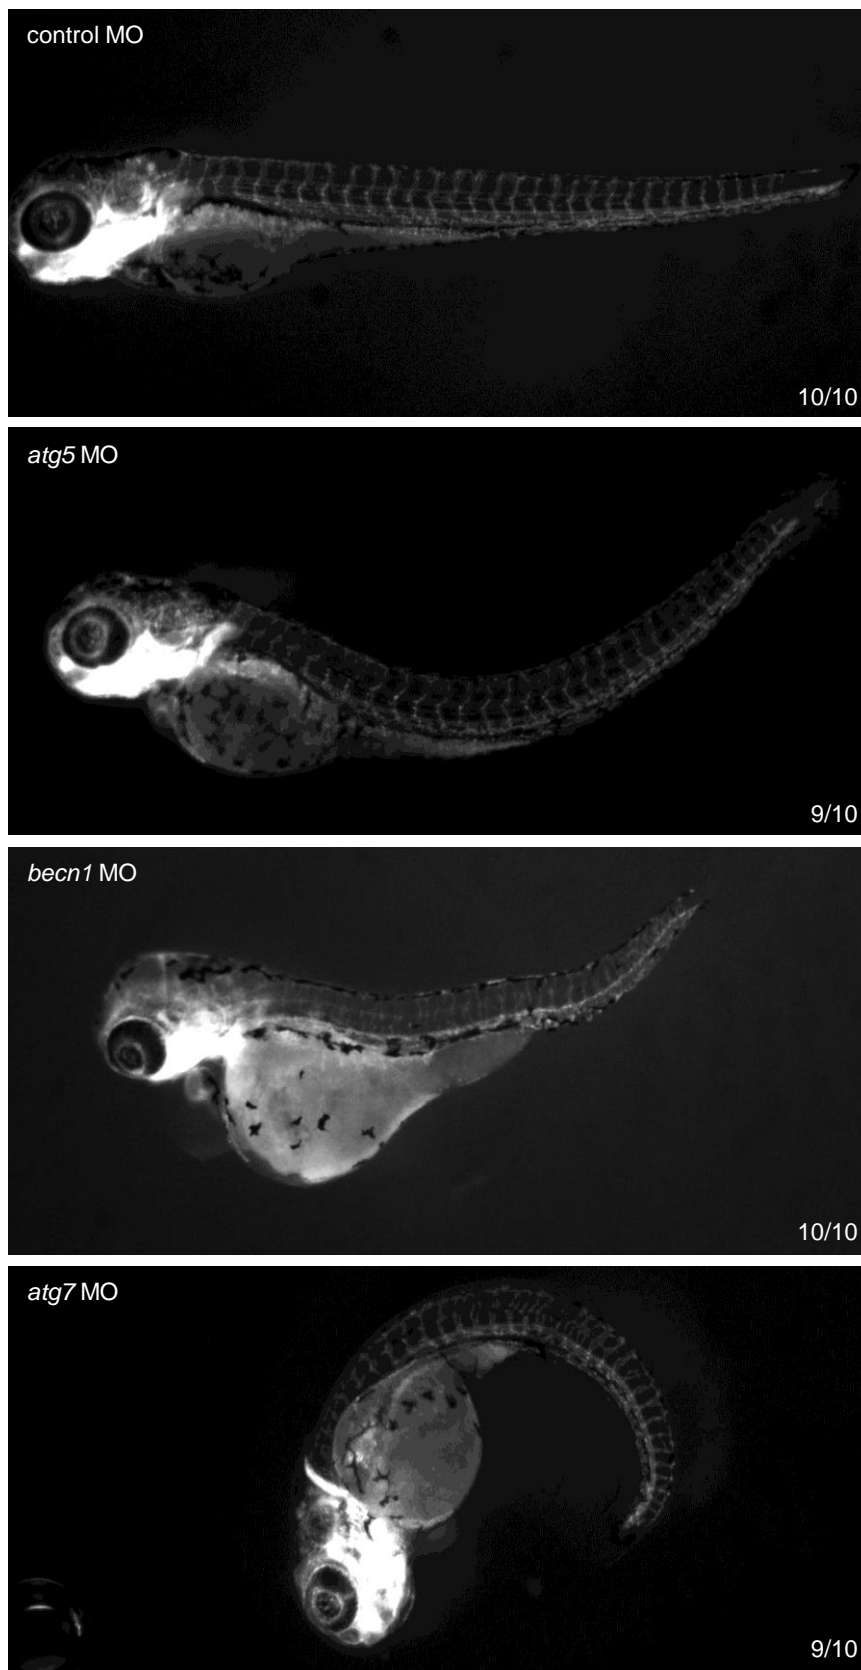

**Figure S6.** Autophagy morphants develop normal vasculature. Representative images of the vasculature in control or indicated autophagy morphants using *Tg(fli1::EGFP)* fish at 3 dpf. None of the control or *becn1* morphants showed abnormal vasculature. 9 out of 10 *atg5*, and 9 out of 10 *atg7* morphants showed normal vasculature.

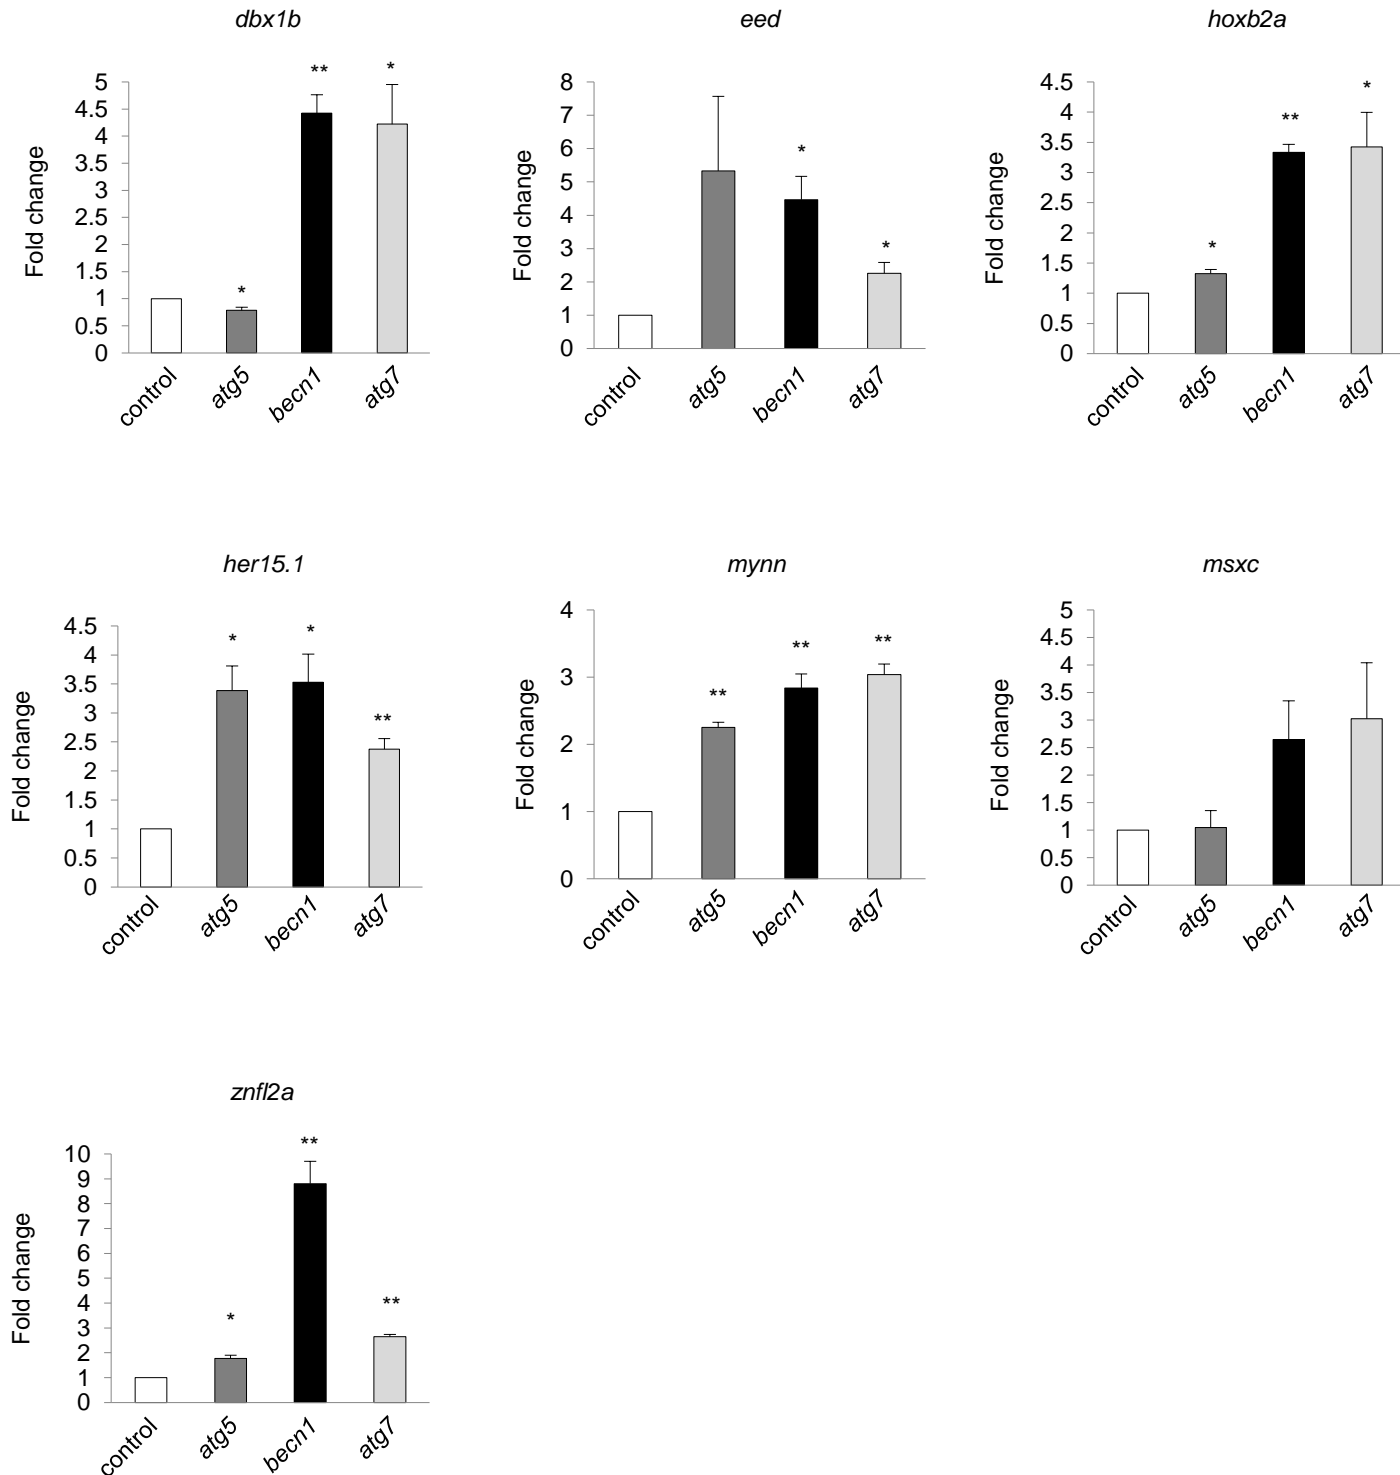

**Figure S7.** Autophagy gene knockdown results in upregulation of transcription factors. Real-time PCR measurement of transcripts for *dbx1b*, *eed*, *hoxb2a*, *her15.1*, *mynn*, *msxc*, and *znfl2a* in purified heart of autophagy morphants at 3 dpf. Results represent the mean  $\pm$  SEM of triplicate samples. \*\* $P < 0.01$ , \* $P < 0.05$  for autophagy morphants versus control morphants by one-tailed t-test.



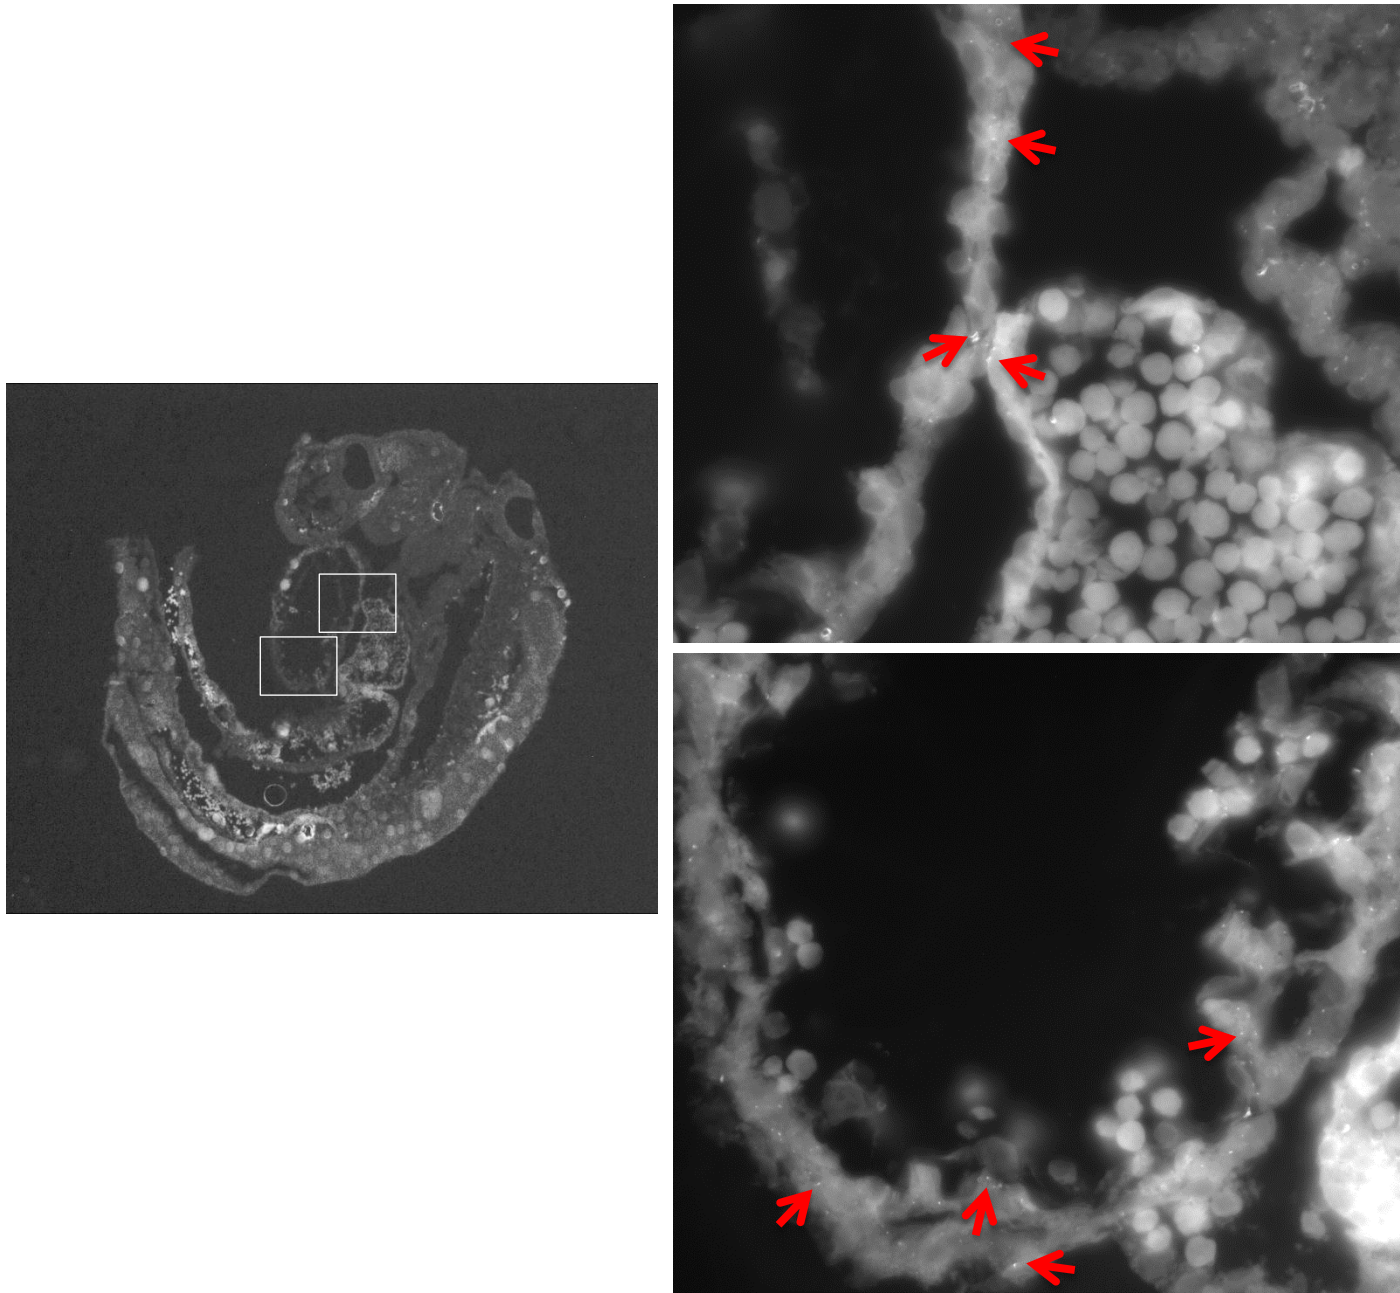

**Figure S8.** Autophagy is active during mouse cardiac development. GFP-LC3 puncta were visualized by fluorescence microscopy. GFP-LC3 embryos at E9.5 were dissected and sectioned in a sagittal orientation. Whole animals were visualized at 4X (left) and GFP-LC3 puncta in AVC (right, top) and cardiomyocytes (right, bottom) were imaged at 63X. Arrows denote representative GFP-LC3 puncta. Scale bar, 50  $\mu$ m.

## Supplementary information

### Supplementary Methods

#### Splice-blocking morpholino injection

Splice blocking-MOs were designed to inhibit the splicing of the exon 2-intron 2 junction in *atg5*, exon 1-intron 1 junction in *atg7*, and the exon 1-intron 1 junction in *becn1* mRNA. In order to optimize MO injections, several different concentrations were tested. Splicing inhibition by MO injection was confirmed by RT-PCR.

#### Primers

| <b>Morpholinos</b>                 |                                              |
|------------------------------------|----------------------------------------------|
| <i>atg5</i> MO                     | 5'-CACATCCTTGTCATCTGCCATTATC-3'              |
| <i>becn1</i> MO                    | ACCTCAAAGTCTCCATGCTTCTTTC-3'                 |
| <i>atg7</i> MO                     | AGCTTCAGACTGGATTCCGCCATCG-3'                 |
| <b>Splice blocking morpholinos</b> |                                              |
| <i>atg5</i> sp MO                  | 5'-ATTCCTTTAACTTACATAGTAGGGT-3'              |
| <i>becn1</i> sp MO                 | 5'-TGTTATTGTGTGTTACTGACTTGTA-3'              |
| <i>atg7</i> sp MO                  | 5'-AGCTCGTTCTCCAAACTCACCGTTA-3'              |
| <b>Primers for RT-PCR</b>          |                                              |
| <i>atg5</i> exon2 F                | 5'-TGACAAGGATGTGCTTCGAG-3'                   |
| <i>atg5</i> exon 3 R               | 5'-ACCACATTCCTCCACATCC-3'                    |
| <i>atg5</i> intron2 R              | 5'-TTTAACAACCAAATGAACACTTATGTCTATTCAACTG -3' |
| <i>becn1</i> exon1 F               | 5'-ACCCACTTTGTGAGGAGTGC-3'                   |
| <i>becn1</i> exon2 R               | 5'-GTCCCTCATCCAGCTCTTTG-3'                   |
| <i>atg7</i> exon1F                 | 5'-GATTCTGGCATCAGCTCACA-3'                   |

|                                        |                                                         |
|----------------------------------------|---------------------------------------------------------|
| <i>atg7</i> exon2 R                    | 5'-GCATCAAATGCGCTGAACT-3'                               |
| <i>atg7</i> exon2 R                    | 5'-TTTGTCGGTGGATTTGAAGG-3'                              |
| <i>atg7</i> intron1 R                  | 5'- AAGCGGGTAAGGTTAATATTGCT -3'                         |
| <i>ulk1b</i> F                         | 5'-GGCAACTATGGGCAGTCTGT-3'                              |
| <i>ulk1b</i> R                         | 5'-ACCTGTGGAGAGAGCTGGAA-3'                              |
| <i>gapdh</i> F                         | 5'-TGGGTGTCAACCATGAGAAA-3'                              |
| <i>gapdh</i> R                         | 5'-TCAACGGTCTTCTGTGTTGC-3'                              |
| <i>actin</i> F                         | 5'-GCTGTTTTCCCCTCCATTGTT-3'                             |
| <i>actin</i> R                         | 5'-TCCCATGCCAACCATCACT-3'                               |
| <b>Primers for riboprobe synthesis</b> |                                                         |
| <i>cmlc2</i> F                         | 5'-GTTGACCAGGCTTTTGCAGT-3'                              |
| <i>cmlc2</i> R                         | 5' TAATACGACTCACTATAGGGAGAATGATGCTCTACTCATAGTCAAGGAA-3' |
| <i>bmp4</i> F                          | 5'-CTGTCCACCAGAGACATCATGATTCC-3'                        |
| <i>bmp4</i> R                          | 5'- TAATACGACTCACTATAGGGAGACTTCATGATGGAATC-3'           |
| <i>notch1b</i> F                       | 5'-GGTTTTACGGGCTCGACCTG-3'                              |
| <i>notch1b</i> R                       | 5'- TAATACGACTCACTATAGGGAGAATCACACTTCCCGTTATTAATA-3'    |
| <i>tbx2b</i> F                         | 5'-CTGATAGCGAGCACGAAATGGAC-3'                           |
| <i>tbx2b</i> R                         | 5'- TAATACGACTCACTATAGGGAGAGGTTGTCCGGTGTTTAGTGGG-3'     |
| <i>foxn4</i> F                         | 5'-CAGACAGAAGTCTGTTGACCCTG-3'                           |
| <i>foxn4</i> R                         | 5'- TAATACGACTCACTATAGGGAGAGCCAGGCAAAGTCCATTATACTGGG-3' |
| <i>tbx5</i> F                          | 5'-CTACCGGCCCTAAGCTACT-3'                               |
| <i>tbx5</i> R                          | 5'- TAATACGACTCACTATAGGGAGAGCTGGCTTCATTCCAGTCAT-3'      |
